# Supplementary material for: Enterococci Mediate the Oviposition Preference of Drosophila melanogaster through Sucrose Catabolism
Source: PubMed Central journal article supplement (PMC5647369; doi:10.1038/s41598-017-13705-5), 2017-10-18
Supplement: 41598_2017_13705_MOESM1_ESM.pdf [file 41598_2017_13705_MOESM1_ESM.pdf]

1 ***Enterococci* Mediate the Oviposition Preference of *Drosophila melanogaster* through**  
2 **Sucrose Catabolism**

3 Wei Liu <sup>1,#,\*</sup>, Ke Zhang <sup>1,#</sup>, Yujuan Li <sup>1</sup>, Wanzhen Su <sup>1</sup>, Kunkun Hu <sup>1,2</sup>, Shan Jin <sup>2</sup>

4 **Supplementary**

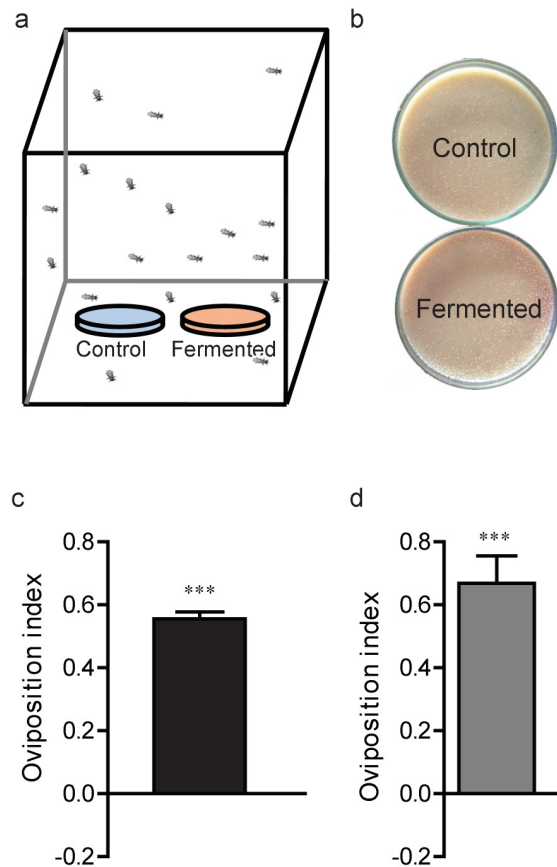

5

6 **Supplementary Figure 1:** The innate oviposition behavior in response to a fermented

7 diet. (a) A diagram of the 2-choice cage with larger dimensions showing the sites

8 available for egg laying. In the assay, 300 female flies were placed in cages (0.5 × 0.5 ×

9 0.6 m) and given the choice to oviposit on two dishes of either control or fermented food.

10 Oviposition dishes from each cage were replaced, and fly egg counts from each dish were

11 made. (b) The representative result of egg laying in the 2-choice cage with larger

12 dimensions. Top: control; bottom: fermented food. (c) The oviposition index in the

13 2-choice cage with larger dimensions. The oviposition index was calculated as (NO. of  
14 eggs laid on experimental food – NO. of eggs laid on control food) / total NO. of eggs  
15 laid. n = 7. (d) The quantification of egg laying preference for fermented media by virgin  
16 females. n = 6. The one-sample *t*-test; Error bars: SEM

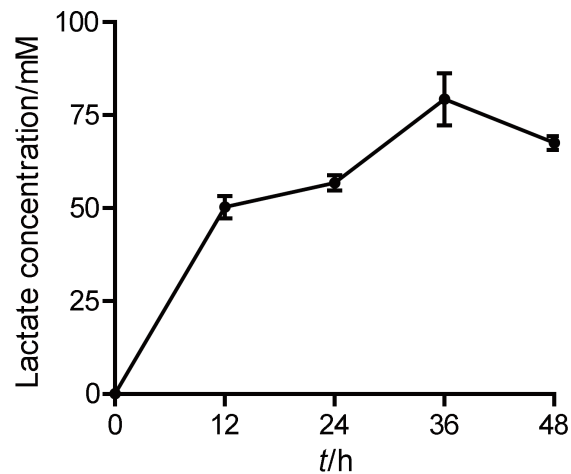

17

18 **Supplementary Figure 2:** The Dynamics of lactate production during fermentation.

19 Lactate of fly food was detected using a commercial kit. Error bars: SEM

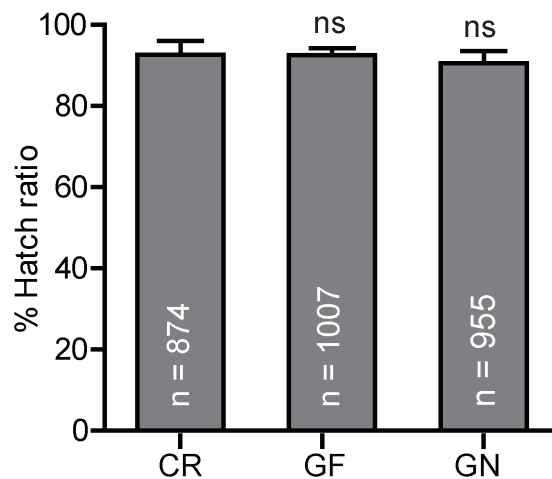

20

21 **Supplementary Figure 3:** The normal hatching ratio of GF eggs

22 The hatching rate of eggs was assessed after 24 h. The significance was calculated by

23 ANOVA tests with LSD post hoc analysis and *P*-values were indicated. Error bars: SEM

24 **Supplementary Table 1: Microorganisms and their sources used in this study**

| <b>Organism (genbank no. available)</b>     | <b>Clade</b> | <b>Source</b>                                                                                         |
|---------------------------------------------|--------------|-------------------------------------------------------------------------------------------------------|
| <i>Lactobacillus plantarum</i> NCIMB 8826   | LAB          | China General Microbiological Culture Collection Center, MRS culture collection                       |
| <i>Lactobacillus plantarus</i> FY1 KY038178 | LAB          | Wild-captured <i>D. melanogaster</i> in Liu Laboratory, MRS culture collection                        |
| <i>Enterococcus faecium</i> KY990052        | LAB          | Wild-captured <i>D. melanogaster</i> in Liu Laboratory, YCFAG culture collection                      |
| <i>Lactococcus lactis</i>                   | LAB          | Wild-captured <i>D. melanogaster</i> in Liu Laboratory, MRS culture collection                        |
| <i>Weissella confusa</i>                    | LAB          | Wild-captured <i>D. melanogaster</i> in Liu Laboratory, MRS culture collection                        |
| <i>Acetobacter orientalis</i> FY1 KX943564  | AAB          | <i>D. melanogaster</i> in Liu Laboratory, NA culture                                                  |
| <i>Acetobacter malorum</i>                  | AAB          | <i>D. melanogaster</i> in Handelsman Laboratory, NA culture                                           |
| <i>Saccharomyces cerevisiae</i>             | Yeast        | YPD culture collection, gifted by Professor Pei Caixia in Shanxi Agricultural University, YPD cultrue |
| <i>Penicillium expansum</i> ATCC 7861       | mold         | China General Microbiological Culture Collection Center, YPD culture                                  |

25 LAB = lactic acid bacteria; AAB = acetic acid bacteria
